# Supplementary material for: Polycondensation and carbonization of phenolic resin on structured nano/chiral silicas: reactions, morphologies and properties
Source: Royal Society of Chemistry journal article supplement (doi:10.1039/c5tb01966d), 2015-11-24
Supplement: c5tb01966d1.pdf [file c5tb01966d1.pdf]

## Supplementary Information

# Polycondensation and Carbonization of Phenolic Resin on Structured Nano/Chiral Silicas: Reactions, Morphologies and Properties

*Xin-Ling Liu<sup>1,2</sup>, Kazuki Moriyama<sup>1</sup>, Yan-Feng Gao<sup>2</sup> and Ren-Hua Jin<sup>1\*</sup>*

<sup>1</sup>Department of Material and Life Chemistry, Kanagawa University,  
3-2-7 Rokkakubashi, Kanagawa-ku, Yokohama 221-8686, Japan

<sup>2</sup>School of Materials and Engineering, Shanghai University, 99 Shangda Road,  
Baoshan District, Shanghai 200444, China

\*Corresponding author: rhjin@kanagwa-u.ac.jp

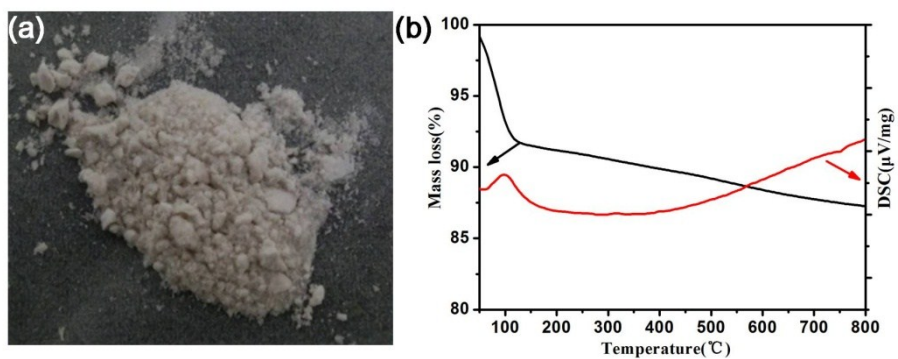

**Figure S1.** (a) Digital images and (b) TG-DTA curves for the sample obtained from PEI@SiO<sub>2</sub> after heating at 700 °C under Ar atmosphere

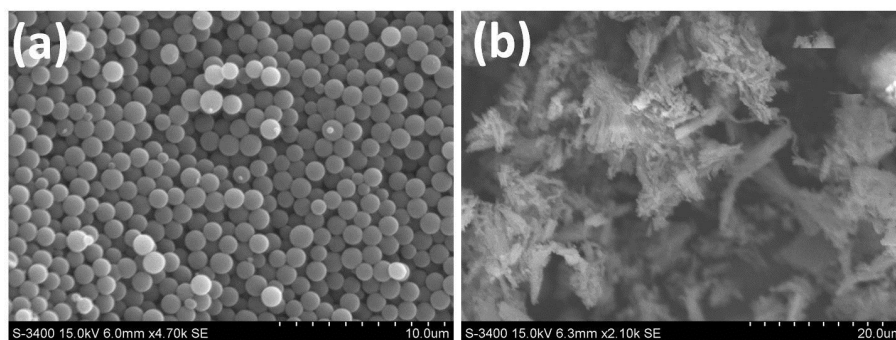

**Figure S2.** SEM images of a) RF and b) PEI@SiO<sub>2</sub>@RF obtained under 80 °C.

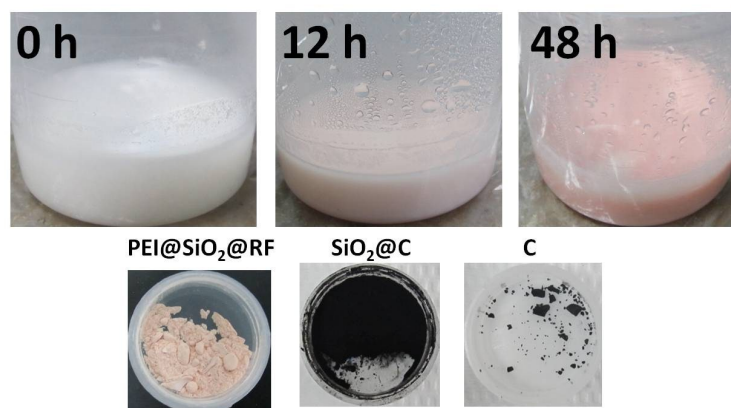

**Figure S3.** Color change (upper row) during the one-pot reaction process and the digital images (bottom row) of samples.

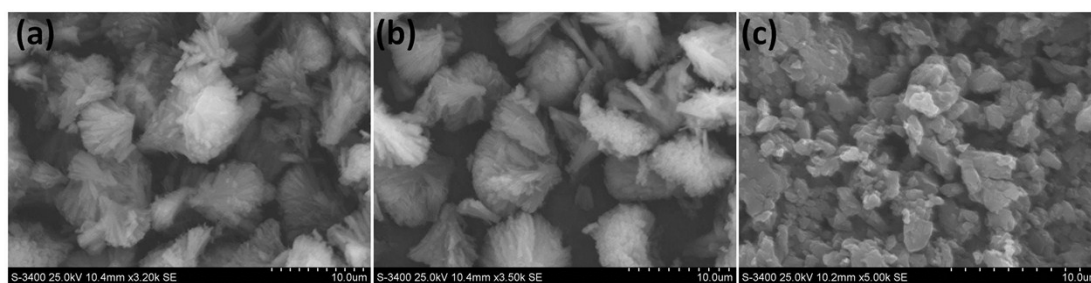

**Figure S4.** SEM images of a) PEI@SiO<sub>2</sub>@RF, b) SiO<sub>2</sub>@C, and c) C obtained by the one-pot reaction process.
